# Supplementary material
Source: publisher site journal article supplement (https://www.spandidos-publications.com/3336/downloadSupplementary)
Supplement: Supplementary file 1 [file downloadSupplementary]

Figure S1. EphA8 overexpression increases proliferation and motility in HS-578T breast cancer cells. Effect of EphA8 overexpression alone or in combination with paclitaxel treatment on HS-578T cell (A) proliferation, analyzed by Cell Counting Kit-8 assay; (B) apoptosis, analyzed by Annexin V-FITC and PI staining followed by flow cytometry; (C) invasion, analyzed via Transwell invasion assay (magnification, x200) and (D) motility, assessed by wound healing assay (magnification, x40). Data are presented as the mean  $\pm$  SD (n=3). \*P<0.05, \*\*P<0.01. EphA8, erythropoietin-producing hepatocellular receptor A8; NC, negative control; OD, optical density.

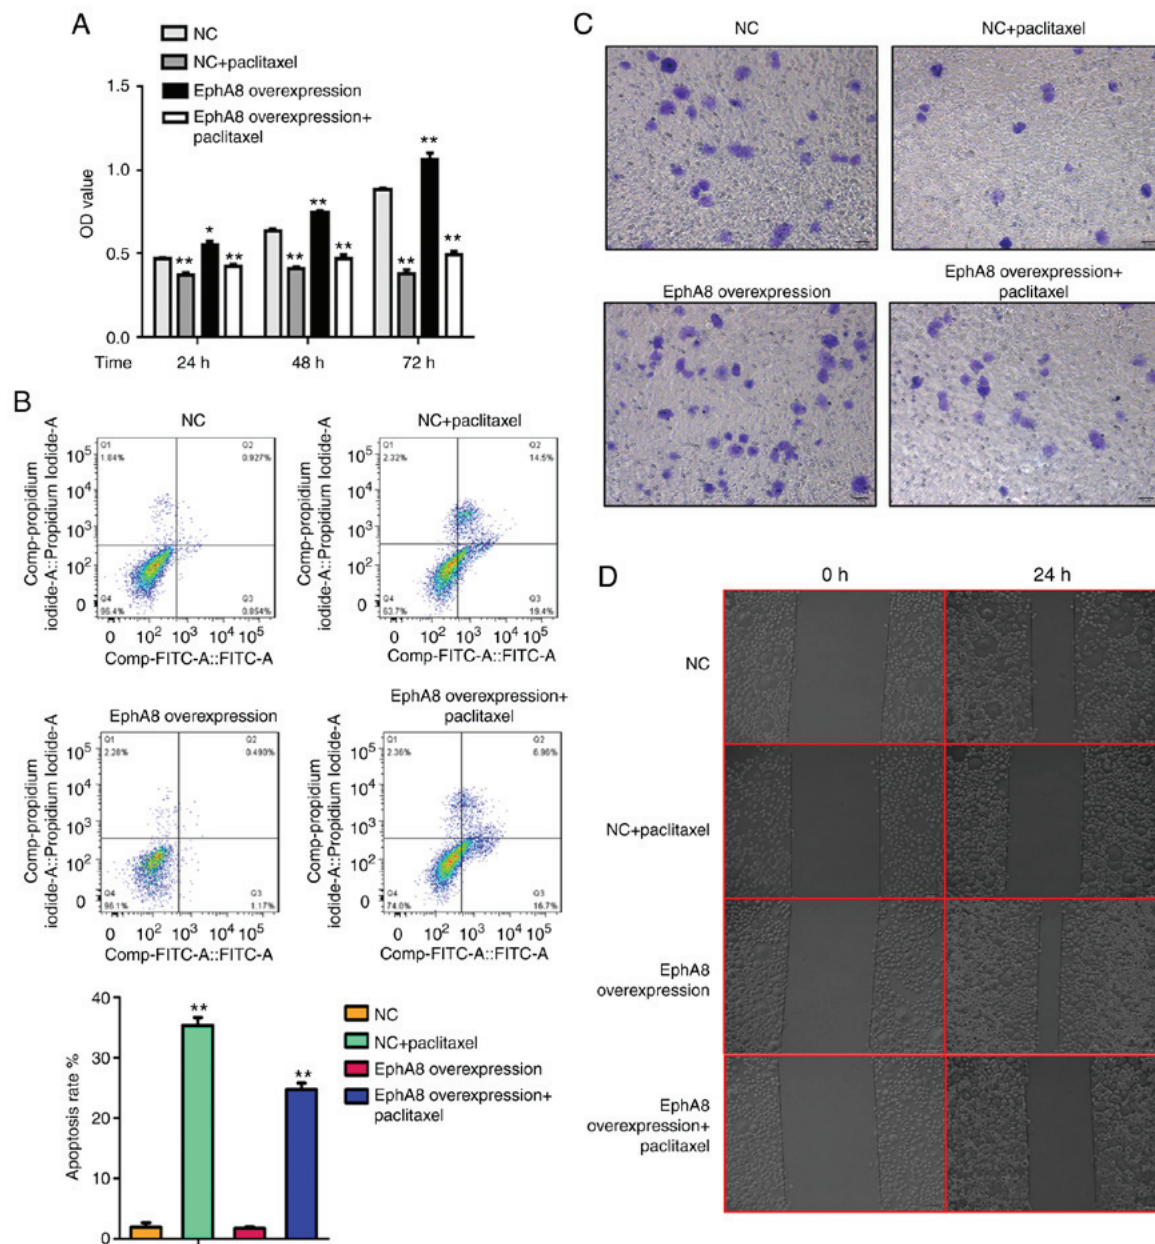

Table SI. Sequences of shRNA for erythropoietin-producing hepatocellular receptor A8.

| shRNA                                    | Sequence (5'→3')      |
|------------------------------------------|-----------------------|
| shRNA-1                                  | TTCTGGATCGAGGCCGTCAAT |
| shRNA-2                                  | TCTATGCTGAGATCAAGTTTA |
| shRNA-3                                  | GGAGAAGATGCACTATCAGAA |
| shRNA-4                                  | ACCAGGTTTGCAACGTCATGA |
| shRNA-NC                                 | TTCTCCGAACGTGTCACGT   |
| sh, short hairpin; NC, negative control. |                       |

Table SII. Association between expression levels of EphA8 and clinicopathological characteristics in patients with breast cancer.

| Characteristic          | EphA8 expression, % |     |      | $\chi^2$ | P-value             |
|-------------------------|---------------------|-----|------|----------|---------------------|
|                         | n                   | Low | High |          |                     |
| Total                   | 151                 | 104 | 47   |          |                     |
| Age at diagnosis, years |                     |     |      | 0.087    | 0.768               |
| ≤Median                 | 83                  | 58  | 25   |          |                     |
| >Median                 | 68                  | 46  | 22   |          |                     |
| NHG                     |                     |     |      | 0.550    | 0.759               |
| I                       | 30                  | 20  | 10   |          |                     |
| II                      | 71                  | 51  | 20   |          |                     |
| III                     | 50                  | 33  | 17   |          |                     |
| Tumor size, mm          |                     |     |      | 16.729   | <0.001 <sup>a</sup> |
| ≤20                     | 66                  | 57  | 9    |          |                     |
| >20                     | 85                  | 47  | 38   |          |                     |
| Nodal status            |                     |     |      | 3.635    | 0.056               |
| Negative                | 94                  | 70  | 24   |          |                     |
| Positive                | 57                  | 34  | 23   |          |                     |
| TNM stage               |                     |     |      | 13.160   | <0.001 <sup>a</sup> |
| 0/I/II                  | 115                 | 88  | 27   |          |                     |
| III/IV                  | 36                  | 16  | 20   |          |                     |
| ER status               |                     |     |      | 1.500    | 0.221               |
| Negative                | 66                  | 42  | 24   |          |                     |
| Positive                | 85                  | 62  | 23   |          |                     |
| PR status               |                     |     |      | 0.399    | 0.528               |
| Negative                | 94                  | 63  | 31   |          |                     |
| Positive                | 57                  | 41  | 16   |          |                     |
| Ki-67 status            |                     |     |      | 2.917    | 0.088               |
| <14%                    | 83                  | 62  | 21   |          |                     |
| ≥14%                    | 68                  | 42  | 26   |          |                     |

ER/PR expression >10% was considered to be positive.  $\chi^2$  was used to test the significance between groups. <sup>a</sup>P<0.05. EphA8, erythropoietin-producing hepatocellular receptor A8; ER, estrogen receptor; PR, progesterone receptor; NHG, Nottingham histological grade.
